# Supplementary material for: Phylogenetics and Biogeography of Lilium ledebourii from the Hyrcanian Forest
Source: MDPI journal article supplement (doi:10.3390/d14020137), 2022-02-15
Supplement: s1 [file s1]

Archive with 1 entries (1 files):
- Supplementary Material Figure S1.pdf
