# Supplementary material for: Phylogenetics and Biogeography of Lilium ledebourii from the Hyrcanian Forest
Source: MDPI journal article supplement (doi:10.3390/d14020137), 2022-02-15

Supplementary Figure S1 Network tree of the genus *Lilium* based on ITS region (a.) and mat K region (b). The color of the circles indicate species' location. To make the form more visible, the number of nodes (black circles) was removed.

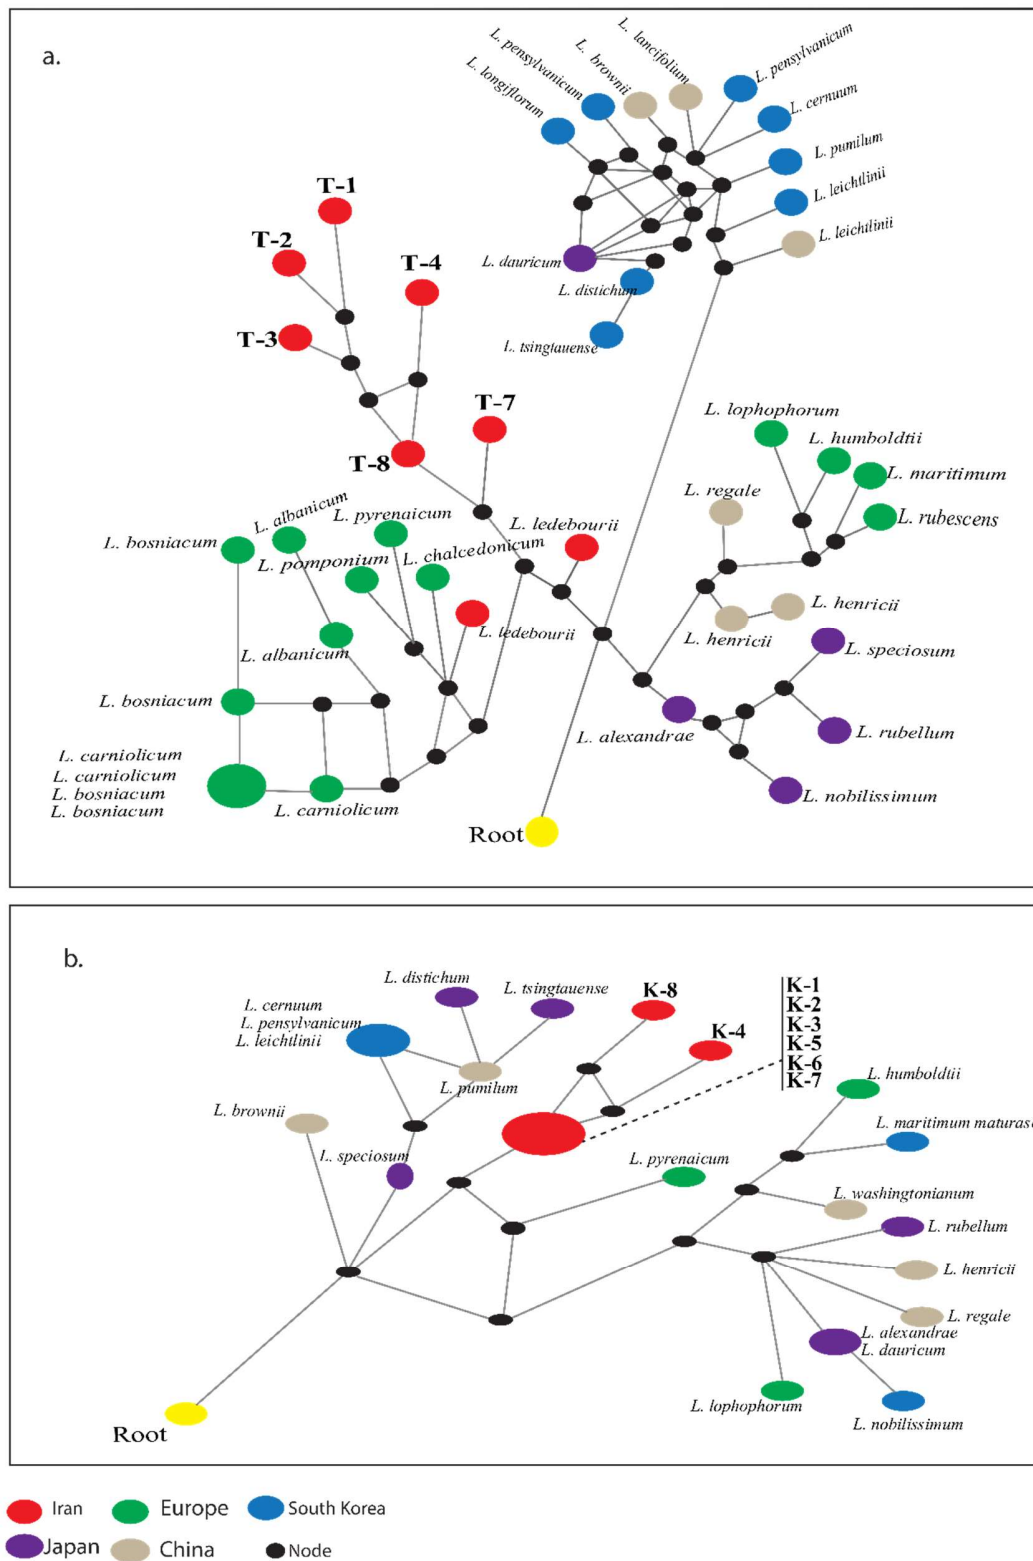

Supplement: s1 [file s1 › Supplementary Material Figure S1.pdf]
